# Supplementary material for: Ischaemic heart disease during pregnancy or post-partum: systematic review and case series
Source: Springer Nature journal article supplement (doi:10.1007/s12471-015-0677-6), 2015-04-13
Supplement: MOESM1 [file 620530]

**Supplemental Table S1.** Characteristics of included literature.

| <b>Authors</b>                        | <b>Year</b> | <b>Type of study</b>   |
|---------------------------------------|-------------|------------------------|
| Aalders K., A. et al. <sup>1</sup>    | 1998        | case series            |
| Agostoni P. et al. <sup>2</sup>       | 2004        | case report            |
| Aliyary,S. et al. <sup>3</sup>        | 2007        | case report            |
| Allen,J.N. et al. <sup>4</sup>        | 1990        | case report            |
| Arimura T. et al. <sup>5</sup>        | 2009        | case report            |
| Ascarelli,M.H. et al. <sup>6</sup>    | 1996        | case report            |
| Babic,Z. et al. <sup>7</sup>          | 2011        | case report            |
| Badui,E. et al. <sup>8</sup>          | 1994        | case series            |
| Balmain,S. et al. <sup>9</sup>        | 1997        | case report            |
| Baskurt,M. et al. <sup>10</sup>       | 2012        | case report            |
| Bauer,M.E. et al. <sup>11</sup>       | 2012        | case report            |
| Beary,J.F. et al. <sup>12</sup>       | 1979        | case series and review |
| Bornstein,A. et al. <sup>13</sup>     | 1984        | case report            |
| Boyer,W.B. et al. <sup>14</sup>       | 2011        | case report            |
| Boztosun,B. et al. <sup>15</sup>      | 2008        | case report            |
| Brahim,Y.B. et al. <sup>16</sup>      | 2008        | case report            |
| Brandenburg,V.M. et al. <sup>17</sup> | 2004        | case report            |
| Bucciarelli,E. et al. <sup>18</sup>   | 1998        | case report            |
| Chabrot,P. et al. <sup>19</sup>       | 2009        | case report            |
| Chant,G.N. <sup>20</sup>              | 1979        | case series and review |
| Chen,Y.C. et al. <sup>21</sup>        | 2009        | case report            |
| Cohen,W.R. et al. <sup>22</sup>       | 1983        | case report            |

|                                   |      |                        |
|-----------------------------------|------|------------------------|
| Collins,J.S. et al. <sup>23</sup> | 2002 | case report and review |
| Collyer,M. et al. <sup>24</sup>   | 2004 | case report            |
| Cowan,N.C. et al. <sup>25</sup>   | 1988 | case report            |
| Craig,S. et al. <sup>26</sup>     | 1999 | case report            |
| Cuthill,J.A. et al. <sup>27</sup> | 2005 | case report and review |
| Dhawan,R. et al. <sup>28</sup>    | 2011 | case report            |
| Dhawan,R. et al. <sup>29</sup>    | 2002 | case report            |
| Diessner,J. et al. <sup>30</sup>  | 2011 | case report            |
| Dwyer,B.K. et al. <sup>31</sup>   | 2005 | case report            |
| Ehya,H. et al. <sup>32</sup>      | 1980 | case report            |
| Eickman,F.M. <sup>33</sup>        | 1996 | case report            |
| Elming,H. et al. <sup>34</sup>    | 1999 | case report and review |
| Emori,T. et al. <sup>35</sup>     | 1993 | case report            |
| Eom,M. et al. <sup>36</sup>       | 2005 | case report            |
| Eriksson,U. et al. <sup>37</sup>  | 1999 | case report            |
| Esinler,I. et al. <sup>38</sup>   | 2003 | case report            |
| Fayomi,O. et al. <sup>39</sup>    | 2007 | case report            |
| Frey,B.W. et al. <sup>40</sup>    | 2006 | case report            |
| Garry,D. et al. <sup>41</sup>     | 1996 | case report            |
| Garvey,P. et al. <sup>42</sup>    | 1998 | case report            |
| Ginwalla,M. et al. <sup>43</sup>  | 2010 | case report            |
| Giudici,M.C. et al. <sup>44</sup> | 1989 | case report            |
| Hamada,S. et al. <sup>45</sup>    | 1996 | case report            |
| Hameed,A.B. et al. <sup>46</sup>  | 2000 | case series            |

|                                        |      |                        |
|----------------------------------------|------|------------------------|
| Hands,M.E. et al. <sup>47</sup>        | 1990 | case series            |
| Hankins,G.D. et al. <sup>48</sup>      | 1985 | case series and review |
| Hoppe,U.C. et al. <sup>49</sup>        | 1998 | case report            |
| Houck,P.D. et al. <sup>50</sup>        | 2012 | case report            |
| Iaccarino,D. et al. <sup>51</sup>      | 2010 | case report            |
| Iadanza,A. et al. <sup>52</sup>        | 2007 | case report and review |
| Janion,M. et al. <sup>53</sup>         | 2007 | case series            |
| Jimenez Valero,S. et al. <sup>54</sup> | 2005 | case series            |
| Jungbluth,A. et al. <sup>55</sup>      | 1988 | case report            |
| Kamran,M. et al. <sup>56</sup>         | 2004 | case report            |
| Kearney,P. et al. <sup>57</sup>        | 1993 | case series and review |
| Klutstein,M.W. et al. <sup>58</sup>    | 1997 | case series            |
| Knoess,M. et al. <sup>59</sup>         | 2007 | case series            |
| Koul,A.K. et al. <sup>60</sup>         | 2001 | case series and review |
| Kuczkowski,K.M. <sup>61</sup>          | 2005 | case report            |
| Kulka,P.J. et al. <sup>62</sup>        | 2000 | case report            |
| Kurum,T. et al. <sup>63</sup>          | 2003 | case report            |
| Laudanski,K. et al. <sup>64</sup>      | 2011 | case report and review |
| Lerakis,S. et al. <sup>65</sup>        | 2001 | case report            |
| Liu,S.S. et al. <sup>66</sup>          | 1992 | case report            |
| Livingston,J.C. et al. <sup>67</sup>   | 2000 | case report            |
| Mabie,W.C. et al. <sup>68</sup>        | 1988 | case report            |
| Madu,E.C. et al. <sup>69</sup>         | 1994 | case report and review |

|                                      |      |                        |
|--------------------------------------|------|------------------------|
| Maeder,M. et al. <sup>70</sup>       | 2005 | case report and review |
| Majdan,J.F. et al. <sup>71</sup>     | 1983 | case report            |
| Mak,K.H. et al. <sup>72</sup>        | 2004 | case report            |
| Makkonen,M. et al. <sup>73</sup>     | 1995 | case report            |
| Marcoff,L. et al. <sup>74</sup>      | 2010 | case report            |
| Martins,R.P. et al. <sup>75</sup>    | 2010 | case report            |
| McAdams,S.A. et al. <sup>76</sup>    | 1986 | case series            |
| McHugh,M.J. et al. <sup>77</sup>     | 1990 | case report and review |
| McKechnie,R.S. et al. <sup>78</sup>  | 2001 | case report            |
| McKeon,V.A. et al. <sup>79</sup>     | 1989 | case report and review |
| Moore,A.D. et al. <sup>80</sup>      | 2012 | case report            |
| Movsesian,M.A. et al. <sup>81</sup>  | 1989 | case report            |
| Nabatian,S. et al. <sup>82</sup>     | 2005 | case series            |
| Nallamothu,B.K. et al. <sup>83</sup> | 2005 | other                  |
| Newell,C.P. et al. <sup>84</sup>     | 2011 | case report            |
| O'Donnell,M. et al. <sup>85</sup>    | 1987 | case report            |
| Oki,K.N. et al. <sup>86</sup>        | 2011 | case report            |
| Ottman,E.H. et al. <sup>87</sup>     | 1993 | case report            |
| Pauleta,J.R. et al. <sup>88</sup>    | 2007 | case report            |
| Phillips,L.M. et al. <sup>89</sup>   | 2006 | case report            |
| Pierre-Louis,B. et al. <sup>90</sup> | 2008 | case report and review |
| Raber,L. et al. <sup>91</sup>        | 2011 | case report            |
| Rademacher,W. et al. <sup>92</sup>   | 2010 | case report            |

|                                     |      |                        |
|-------------------------------------|------|------------------------|
| Rahman,S. et al. <sup>93</sup>      | 2009 | case report            |
| Rajab,T.K. et al. <sup>94</sup>     | 2010 | case report            |
| Ramineni,R. et al. <sup>95</sup>    | 2010 | case report            |
| Rensing,B.J. et al. <sup>96</sup>   | 1999 | case report            |
| Rifai,L. et al. <sup>97</sup>       | 2011 | case report            |
| Sabatine,M.S. et al. <sup>98</sup>  | 2010 | case report            |
| Sage,M.D. et al. <sup>99</sup>      | 1986 | case report            |
| Salam,A.M. <sup>100</sup>           | 2005 | case report            |
| Salem,D.N. et al. <sup>101</sup>    | 1984 | case report            |
| Samuels,L.E. et al. <sup>102</sup>  | 1998 | case report            |
| Saxena,R. et al. <sup>103</sup>     | 1992 | case report            |
| Schiff,J.H. et al. <sup>104</sup>   | 2007 | case report            |
| Schumacher,B. et al. <sup>105</sup> | 1997 | case report            |
| Sebastian,C. et al. <sup>106</sup>  | 1998 | case report            |
| Shahabi,S. et al. <sup>107</sup>    | 2008 | case series and review |
| Sharma,A.M. et al. <sup>108</sup>   | 2011 | case report            |
| Shaver,P.J. et al. <sup>109</sup>   | 1978 | case report            |
| Sherif,H.M. et al. <sup>110</sup>   | 2008 | case report            |
| Silberman,S. et al. <sup>111</sup>  | 1996 | case report            |
| Skoura,A. et al. <sup>112</sup>     | 2008 | case report            |
| Spencer,J. et al. <sup>113</sup>    | 1994 | case report            |
| Stefanovic,V. et al. <sup>114</sup> | 2004 | case report            |
| Tang,A.T. et al. <sup>115</sup>     | 2004 | case report            |
| Tatham,K. et al. <sup>116</sup>     | 2010 | case report            |

|                                          |      |                        |
|------------------------------------------|------|------------------------|
| Taylor,G.W. et al. <sup>117</sup>        | 1993 | case report            |
| Togni,M. et al. <sup>118</sup>           | 1999 | case report            |
| Trouton,T.G. et al. <sup>119</sup>       | 1988 | case series            |
| Ulm,M.R. et al. <sup>120</sup>           | 1996 | case report            |
| van de Putte,P. et al. <sup>121</sup>    | 1995 | case series            |
| Varadarajan,P. et al. <sup>122</sup>     | 2006 | case report            |
| Vogiatzis,I. et al. <sup>123</sup>       | 2010 | case report            |
| von Steinburg,S.P. et al. <sup>124</sup> | 2011 | case report            |
| Webber,M.D. et al. <sup>125</sup>        | 1997 | case report            |
| Wittry,M.D. et al. <sup>126</sup>        | 1989 | case report            |
| Yla-Outinen,A. et al. <sup>127</sup>     | 1989 | case report and review |
| Zaidi,A.N. et al. <sup>128</sup>         | 2008 | case report            |

#### References in table:

1. Aalders K, Huisman A, Bosker HA. Myocardial infarct in the puerperium. *Ned Tijdschr Geneeskd.* 1998; 142:1103-1105.
2. Agostoni P, Gasparini G, Destro G. Acute myocardial infarction probably caused by paradoxical embolus in a pregnant woman. *Heart.* 2004; 90:e12.
3. Aliyary S, Mariani MA, Verhorst PM, Hartmann M, Stoel MG, von Birgelen C. Staged therapeutic approach in spontaneous coronary dissection. *Ann Thorac Surg.* 2007; 83:1879-1881.
4. Allen JN, Wewers MD. Acute myocardial infarction with cardiogenic shock during pregnancy: Treatment with intra-aortic balloon counterpulsation. *Crit Care Med.* 1990; 18:888-889.
5. Arimura T, Mitsutake R, Miura S, Nishikawa H, Kawamura A, Saku K. Acute myocardial infarction associated with pregnancy successfully treated with percutaneous coronary intervention. *Intern Med.* 2009; 48:1383-1386.

6. Ascarelli MH, Grider AR, Hsu HW. Acute myocardial infarction during pregnancy managed with immediate percutaneous transluminal coronary angioplasty. *Obstet Gynecol.* 1996; 88:655-657.
7. Babic Z, Gabric ID, Pintaric H. Successful primary percutaneous coronary intervention in the first trimester of pregnancy. *Catheter Cardiovasc Interv.* 2011; 77:522-525.
8. Badui E, Rangel A, Enciso R, et al. Acute myocardial infarction during pregnancy and puerperium in athletic women. two case reports. *Angiology.* 1994; 45:897-902.
9. Balmain S, McCullough CT, Love C, Hughes R, Heidemann B, Bloomfield P. Acute myocardial infarction during pregnancy successfully treated with primary percutaneous coronary intervention. *Int J Cardiol.* 2007; 116:e85-7.
10. Baskurt M, Ozkan T, Arat Ozkan A, Gurmen T. Acute myocardial infarction in a young pregnant woman. *Anadolu Kardiyol Derg.* 2010; 10:285-286.
11. Bauer ME, Bauer ST, Rabbani AB, Mhyre JM. Peripartum management of dual antiplatelet therapy and neuraxial labor analgesia after bare metal stent insertion for acute myocardial infarction. *Anesth Analg.* 2012; 115:613-615.
12. Beary JF, Summer WR, Bulkley BH. Postpartum acute myocardial infarction: A rare occurrence of uncertain etiology. *Am J Cardiol.* 1979; 43:158-161.
13. Bornstein A, Dalal P, Tischler J, Novack S, Michaelson S. Acute myocardial infarction in a thirty-six year old postpartum female. *Angiology.* 1984; 35:591-594.
14. Boyer WB, Atalay MK, Sharaf BL. Left main pseudoaneurysm after postpartum coronary dissection. *Circ Cardiovasc Interv.* 2011; 4:303-305.
15. Boztosun B, Olcay A, Avci A, Kirma C. Treatment of acute myocardial infarction in pregnancy with coronary artery balloon angioplasty and stenting: Use of tirofiban and clopidogrel. *Int J Cardiol.* 2008; 127:413-416.

16. Brahim YB, Landoulsi H, Yassin A, Falfoul A. Pregnancy complicated by myocardial infarction. *Int J Gynaecol Obstet.* 2008; 103:65-66.
17. Brandenburg VM, Frank RD, Heintz B, Rath W, Bartz C. HELLP syndrome, multifactorial thrombophilia and postpartum myocardial infarction. *J Perinat Med.* 2004; 32:181-183.
18. Bucciarelli E, Fratini D, Gilardi G, Affronti G. Spontaneous dissecting aneurysm of coronary artery in a pregnant woman at term. *Pathol Res Pract.* 1998; 194:137-139.
19. Chabrot P, Motreff P, Boyer L. Postpartum spontaneous coronary artery dissection: A case of pseudoaneurysm evolution detected on MDCT. *AJR Am J Roentgenol.* 2006; 187:W660.
20. Chant GN. Coronary anatomy in postpartum acute myocardial infarction. *Am J Cardiol.* 1980; 45:912.
21. Chen YC, Chang YM, Yeh GP, Tsai HD, Hsieh CT. Acute myocardial infarction during pregnancy. *Taiwan J Obstet Gynecol.* 2009; 48:181-185.
22. Cohen WR, Steinman T, Patsner B, Snyder D, Satwicz P, Monroy P. Acute myocardial infarction in a pregnant woman at term. *JAMA.* 1983; 250:2179-2181.
23. Collins JS, Bossone E, Eagle KA, Mehta RH. Asymptomatic coronary artery disease in a pregnant patient. A case report and review of literature. *Herz.* 2002; 27:548-554.
24. Collyer M, Bellenger N, Nachimuthu P, Parasuraman R, Taylor MJ. Postpartum coronary artery dissection. *J Obstet Gynaecol.* 2008; 28:451-453.
25. Cowan NC, de Belder MA, Rothman MT. Coronary angioplasty in pregnancy. *Br Heart J.* 1988; 59:588-592.
26. Craig S, Ilton M. Treatment of acute myocardial infarction in pregnancy with coronary artery balloon angioplasty and stenting. *Aust N Z J Obstet Gynaecol.* 1999; 39:194-196.
27. Cuthill JA, Young S, Greer IA, Oldroyd K. Anaesthetic considerations in a parturient with critical coronary artery disease and a drug-eluting stent presenting for caesarean section. *Int J Obstet Anesth.* 2005; 14:167-171.

28. Dhawan R, Kacha A, Chaney MA, Fox AA, Wong CA. Case 2--2011: Acute myocardial infarction in a pregnant patient requiring coronary artery bypass graft surgery. *J Cardiothorac Vasc Anesth.* 2011; 25:353-361.
29. Dhawan R, Singh G, Fesniak H. Spontaneous coronary artery dissection: The clinical spectrum. *Angiology.* 2002; 53:89-93.
30. Diessner J, Heuer S, Engel JB, et al. Myocardial infarction in the 34th week of gestation: Case report. *Z Geburtshilfe Neonatol.* 2011; 215:209-211.
31. Dwyer BK, Taylor L, Fuller A, Brummel C, Lyell DJ. Percutaneous transluminal coronary angioplasty and stent placement in pregnancy. *Obstet Gynecol.* 2005; 106:1162-1164.
32. Ehya H, Weitzner S. Postpartum dissecting aneurysm of coronary arteries in a patient with sarcoidosis. *South Med J.* 1980; 73:87-88.
33. Eickman FM. Acute coronary artery angioplasty during pregnancy. *Cathet Cardiovasc Diagn.* 1996; 38:369-372.
34. Elming H, Kober L. Spontaneous coronary artery dissection. case report and literature review. *Scand Cardiovasc J.* 1999; 33:175-179.
35. Emori T, Goto Y, Maeda T, Chiba Y, Haze K. Multiple coronary artery dissections diagnosed in vivo in a pregnant woman. *Chest.* 1993; 104:289-290.
36. Eom M, Lee JH, Chung JH, Lee H. An autopsy case of postpartum acute myocardial infarction associated with postpartum ergot alkaloids administration in old-aged pregnant women. *Yonsei Med J.* 2005; 46:866-869.
37. Eriksson U, Atar D, Krahenmann F, et al. Profound ECG abnormalities during emergency cesarean section in a patient with pre-eclampsia. *Scand Cardiovasc J.* 1999; 33:183-186.
38. Esinler I, Yigit N, Ayhan A, Kes S, Aytemir K, Acil T. Coronary artery dissection during pregnancy. *Acta Obstet Gynecol Scand.* 2003; 82:194-196.

39. Fayomi O, Nazar R. Acute myocardial infarction in pregnancy: A case report and subject review. *Emerg Med J.* 2007; 24:800-801.
40. Frey BW, Grant RJ. Pregnancy-associated coronary artery dissection: A case report. *J Emerg Med.* 2006; 30:307-310.
41. Garry D, Leikin E, Fleisher AG, Tejani N. Acute myocardial infarction in pregnancy with subsequent medical and surgical management. *Obstet Gynecol.* 1996; 87:802-804.
42. Garvey P, Elovitz M, Landsberger EJ. Aortic dissection and myocardial infarction in a pregnant patient with turner syndrome. *Obstet Gynecol.* 1998; 91:864.
43. Ginwalla M, Pillai D, Gandhi S. Use of intra-aortic balloon counterpulsation during emergent cesarean section in a pregnant patient with myocardial infarction. *J Invasive Cardiol.* 2010; 22:E104-6.
44. Giudici MC, Artis AK, Webel RR, Alpert MA. Postpartum myocardial infarction treated with percutaneous transluminal coronary angioplasty. *Am Heart J.* 1989; 118:614-616.
45. Hamada S, Hinokio K, Naka O, Higuchi K, Takahashi H, Sumitani H. Myocardial infarction as a complication of pheochromocytoma in a pregnant woman. *Eur J Obstet Gynecol Reprod Biol.* 1996; 70:197-200.
46. Hameed AB, Tummala PP, Goodwin TM, et al. Unstable angina during pregnancy in two patients with premature coronary atherosclerosis and aortic stenosis in association with familial hypercholesterolemia. *Am J Obstet Gynecol.* 2000; 182:1152-1155.
47. Hands ME, Johnson MD, Saltzman DH, Rutherford JD. The cardiac, obstetric, and anesthetic management of pregnancy complicated by acute myocardial infarction. *J Clin Anesth.* 1990; 2:258-268.
48. Hankins GD, Wendel GD, Jr, Leveno KJ, Stoneham J. Myocardial infarction during pregnancy: A review. *Obstet Gynecol.* 1985; 65:139-146.
49. Hoppe UC, Beuckelmann DJ, Bohm M, Erdmann E. A young mother with severe chest pain. *Heart.* 1998; 79:205.

50. Houck PD, Strimel WJ, Gantt DS, Linz WJ. Should we establish a new protocol for the treatment of peripartum myocardial infarction? *Tex Heart Inst J*. 2012; 39:244-248.
51. Iaccarino D, Monopoli D, Rampino KC, Sangiorgi GM, Modena MG. Acute ST elevation myocardial infarction in early puerperium due to left main coronary thrombosis in a woman with thrombophilic state: A case report. *J Cardiovasc Med (Hagerstown)*. 2010; 11:758-761.
52. Iadanza A, Del Pasqua A, Barbati R, et al. Acute ST elevation myocardial infarction in pregnancy due to coronary vasospasm: A case report and review of literature. *Int J Cardiol*. 2007; 115:81-85.
53. Janion M, Sielski J, Janion-Sadowska A. Myocardial infarction in pregnant women--case reports. *Int J Cardiol*. 2007; 121:207-209.
54. Jimenez Valero S, Garcia E, Delcan JL. Acute myocardial infarction during puerperium. report of two cases of multivessel involvement treated with primary coronary intervention. *J Invasive Cardiol*. 2005; 17:632-633.
55. Jungbluth A, Erbel R, Darius H, Rumpelt HJ, Meyer J. Paradoxical coronary embolism: Case report and review of the literature. *Am Heart J*. 1988; 116:879-885.
56. Kamran M, Suresh V, Ahluwalia A. Percutaneous transluminal coronary angioplasty (PTCA) combined with stenting for acute myocardial infarction in pregnancy. *J Obstet Gynaecol*. 2004; 24:701-702.
57. Kearney P, Singh H, Hutter J, Khan S, Lee G, Lucey J. Spontaneous coronary artery dissection: A report of three cases and review of the literature. *Postgrad Med J*. 1993; 69:940-945.
58. Klutstein MW, Tzivoni D, Bitran D, Mendzelevski B, Ilan M, Almagor Y. Treatment of spontaneous coronary artery dissection: Report of three cases. *Cathet Cardiovasc Diagn*. 1997; 40:372-376.
59. Knoess M, Otto M, Kracht T, Neis P. Two consecutive fatal cases of acute myocardial infarction caused by free floating thrombus in the ascending aorta and review of literature. *Forensic Sci Int*. 2007; 171:78-83.

60. Koul AK, Hollander G, Moskovits N, Frankel R, Herrera L, Shani J. Coronary artery dissection during pregnancy and the postpartum period: Two case reports and review of literature. *Catheter Cardiovasc Interv.* 2001; 52:88-94.
61. Kuczkowski KM. Cardiovascular complications of recreational cocaine use in pregnancy: Myth or reality? *Acta Obstet Gynecol Scand.* 2005; 84:100-101.
62. Kulka PJ, Scheu C, Tryba M, Oberheiden R, Zenz M. Coronary artery plaque disruption as cause of acute myocardial infarction during cesarean section with spinal anesthesia. *J Clin Anesth.* 2000; 12:335-338.
63. Kurum T, Soy M, Karahasanoglu E, Ozbay G, Sayin NC. A case of primary antiphospholipid syndrome who developed acute myocardial infarction followed by early-onset pre-eclampsia. *Clin Rheumatol.* 2003; 22:160-161.
64. Laudanski K, Euliano T. Peripartum acute coronary syndrome in an otherwise healthy patient. *J Clin Anesth.* 2011; 23:661-665.
65. Lerakis S, Manoukian S, Martin RP. Transesophageal echo detection of postpartum coronary artery dissection. *J Am Soc Echocardiogr.* 2001; 14:1132-1133.
66. Liu SS, Forrester RM, Murphy GS, Chen K, Glassenberg R. Anaesthetic management of a parturient with myocardial infarction related to cocaine use. *Can J Anaesth.* 1992; 39:858-861.
67. Livingston JC, Mabie BC, Ramanathan J. Crack cocaine, myocardial infarction, and troponin I levels at the time of cesarean delivery. *Anesth Analg.* 2000; 91:913-5, table of contents.
68. Mabie WC, Anderson GD, Addington MB, Reed CM, Jr, Peeden PZ, Sibai BM. The benefit of cesarean section in acute myocardial infarction complicated by premature labor. *Obstet Gynecol.* 1988; 71:503-506.
69. Madu EC, Kosinski DJ, Wilson WR, Burket MW, Fraker TD, Jr, Ansel GM. Two-vessel coronary artery dissection in the peripartum period. case report and literature review. *Angiology.* 1994; 45:809-816.
70. Maeder M, Ammann P, Drack G, Rickli H. Pregnancy-associated spontaneous coronary artery dissection: Impact of medical treatment. case report and systematic review. *Z Kardiol.* 2005; 94:829-835.

71. Majdan JF, Walinsky P, Cowchock SF, Wapner RJ, Plzak L, Jr. Coronary artery bypass surgery during pregnancy. *Am J Cardiol.* 1983; 52:1145-1146.
72. Mak KH, Chee JJ. Myocardial infarction and HELLP: A case of heightened vasomotor reactivity. *Int J Cardiol.* 2004; 97:151-152.
73. Makkonen M, Hietakorpi S, Orden MR, Saarikoski S. Myocardial infarction during pregnancy. *Eur J Obstet Gynecol Reprod Biol.* 1995; 58:81-83.
74. Marcoff L, Popescu A, Price L, et al. Spontaneous coronary artery dissection in a postpartum woman presenting with chest pain. *Am J Emerg Med.* 2010; 28:641.e5-641.e7.
75. Martins RP, Leurent G, Corbineau H, et al. Coronary angiography of pregnancy-associated coronary artery dissection: A high-risk procedure. *Cardiovasc Revasc Med.* 2010; 11:182-185.
76. McAdams SA, Maguire FE. Unusual manifestations of peripartal cardiac disease. *Crit Care Med.* 1986; 14:910-912.
77. McHugh MJ, Taubman MR. Postpartum myocardial infarction: A rehabilitation challenge. *J Cardiovasc Nurs.* 1990; 4:57-63.
78. McKechnie RS, Patel D, Eitzman DT, Rajagopalan S, Murthy TH. Spontaneous coronary artery dissection in a pregnant woman. *Obstet Gynecol.* 2001; 98:899-902.
79. McKeon VA, Perrin KO. The pregnant woman with a myocardial infarction: Nursing diagnosis. *Dimens Crit Care Nurs.* 1989; 8:92-100.
80. Moore AD, Hill J. Myocardial infarction and pregnancy: A case report. *AANA J.* 2012; 80:32-36.
81. Movsesian MA, Wray RB. Postpartum myocardial infarction. *Br Heart J.* 1989; 62:154-156.
82. Nabatian S, Quinn P, Brookfield L, Lakier J. Acute coronary syndrome and preeclampsia. *Obstet Gynecol.* 2005; 106:1204-1206.

83. Nallamotheu BK, Saint M, Saint S, Mukherjee D. Clinical problem-solving. double jeopardy. *N Engl J Med.* 2005; 353:75-80.
84. Newell CP, Seller C, Vizhi M, Turner N. Case report: Spontaneous coronary artery dissection during elective caesarean section under spinal anaesthesia. *Anaesthesia.* 2011; 66:615-619.
85. O'Donnell M, Meecham J, Tosson SR, Ward S. Ventricular fibrillation and reinfarction in pregnancy. *Postgrad Med J.* 1987; 63:1095-1096.
86. Oki KN, Sinha R, Lee AW, Baker CJ. Emergency off-pump revascularization for left main dissection in pregnancy. *Am Surg.* 2011; 77:253-255.
87. Ottman EH, Gall SA. Myocardial infarction in the third trimester of pregnancy secondary to an aortic valve thrombus. *Obstet Gynecol.* 1993; 81:804-805.
88. Pauleta JR, Clode N, Tuna M, Graca LM. Acute myocardial infarction in pregnancy recurring in the puerperium. *J Obstet Gynaecol.* 2007; 27:520-521.
89. Phillips LM, Makaryus AN, Beldner S, Spatz A, Smith-Levitin M, Marchant D. Coronary artery dissection during pregnancy treated with medical therapy. *Cardiol Rev.* 2006; 14:155-157.
90. Pierre-Louis B, Singh P, Frishman WH. Acute inferior wall myocardial infarction and percutaneous coronary intervention of the right coronary during active labor: A clinical report and review of the literature. *Cardiol Rev.* 2008; 16:260-268.
91. Raber L, Meier B, Steiger VS, Gugger M, Vogel R. Peripartur myocardial infarction caused by placenta embolus. *Circulation.* 2011; 124:e26-7.
92. Rademacher W, Lauten A, Lauten A, Ragoschke-Schumm A, Figulla HR. Postpartum unmasking of a severe triple-vessel-disease with acute myocardial infarction. *Clin Res Cardiol.* 2010; 99:463-466.
93. Rahman S, Abdul-Waheed M, Helmy T, et al. Spontaneous left main coronary artery dissection complicated by pseudoaneurysm formation in pregnancy: Role of CT coronary angiography. *J Cardiothorac Surg.* 2009; 4:15.

94. Rajab TK, Khalpey Z, Kraemer B, Resnic FS, Gallegos RP. Recurrent post-partum coronary artery dissection. *J Cardiothorac Surg.* 2010; 5:78.
95. Ramineni R, Daniel GK. Association of a patent foramen ovale with myocardial infarction and pulmonary emboli in a peripartum woman. *Am J Med Sci.* 2010; 340:326-328.
96. Rensing BJ, Kofflard M, van den Brand MJ, Foley DP. Spontaneous dissections of all three coronary arteries in a 33-week-pregnant woman. *Catheter Cardiovasc Interv.* 1999; 48:207-210.
97. Rifai L, Trabolsi M, Dia M. Coronary embolus complicating peripartum cardiomyopathy. *J Invasive Cardiol.* 2011; 23:E237-40.
98. Sabatine MS, Jaffer FA, Staats PN, Stone JR. Case records of the massachusetts general hospital. case 28-2010. A 32-year-old woman, 3 weeks post partum, with substernal chest pain. *N Engl J Med.* 2010; 363:1164-1173.
99. Sage MD, Koelmeyer TD, Smeeton WM. Fatal postpartum coronary artery dissection. A light- and electron-microscope study. *Am J Forensic Med Pathol.* 1986; 7:107-111.
100. Salam AM. Acute myocardial infarction in the first trimester of pregnancy. *Asian Cardiovasc Thorac Ann.* 2005; 13:175-177.
101. Salem DN, Isner JM, Hopkins P, Konstam MA. Ergonovine provocation in post partum myocardial infarction. *Angiology.* 1984; 35:110-114.
102. Samuels LE, Kaufman MS, Morris RJ, Brockman SK. Postpartum coronary artery dissection: Emergency coronary artery bypass with ventricular assist device support. *Coron Artery Dis.* 1998; 9:457-460.
103. Saxena R, Nolan TE, von Dohlen T, Houghton JL. Postpartum myocardial infarction treated by balloon coronary angioplasty. *Obstet Gynecol.* 1992; 79:810-812.

104. Schiff JH, Gries A, Eehalt R, Elsaesser M, Katus HA, Meyer FJ. A pregnant woman with acute myocardial infarction due to coronary artery dissection: Pre-hospital and in-hospital management. *Resuscitation*. 2007; 73:467-474.
105. Schumacher B, Belfort MA, Card RJ. Successful treatment of acute myocardial infarction during pregnancy with tissue plasminogen activator. *Am J Obstet Gynecol*. 1997; 176:716-719.
106. Sebastian C, Scherlag M, Kugelmass A, Schechter E. Primary stent implantation for acute myocardial infarction during pregnancy: Use of abciximab, ticlopidine, and aspirin. *Cathet Cardiovasc Diagn*. 1998; 45:275-279.
107. Shahabi S, Smith NA, Chanana C, Abbott JD, Copel J, Setaro JF. Pregnancy-associated myocardial infarction: A report of two cases and review of the literature. *Ups J Med Sci*. 2008; 113:325-330.
108. Sharma AM, Yactine H, Vedala G. Coronary vasospasm in a postpartum woman. *J Invasive Cardiol*. 2011; 23:E31-3.
109. Shaver PJ, Carrig TF, Baker WP. Postpartum coronary artery dissection. *Br Heart J*. 1978; 40:83-86.
110. Sherif HM, Nguyen HC, Sarter BH, et al. Spontaneous coronary dissection in late pregnancy: A multidisciplinary approach to management. *Ann Thorac Surg*. 2008; 85:1793-1794.
111. Silberman S, Fink D, Berko RS, Mendzelevski B, Bitran D. Coronary artery bypass surgery during pregnancy. *Eur J Cardiothorac Surg*. 1996; 10:925-926.
112. Skoura A, Michaelides M, Trikas A. Post-preeclampsia acute myocardial infarction during puerperium in a woman with normal coronary vessels. *Hellenic J Cardiol*. 2008; 49:55-58.
113. Spencer J, Gadalla F, Wagner W, Blake J. Caesarean section in a diabetic patient with a recent myocardial infarction. *Can J Anaesth*. 1994; 41:516-518.
114. Stefanovic V, Ulander VM, Graner M, Kupari M, Kaaja R. Myocardial infarction in early pregnancy. *J Perinat Med*. 2004; 32:541-542.

115. Tang AT, Cusimano RJ. Spontaneous coronary artery dissection complicating midterm pregnancy. *Ann Thorac Surg.* 2004; 78:e35.
116. Tatham K, Hughes-Roberts Y, Davies S, Johnson M, Ashpole K, Cox M. Peripartum cardiac chest pain and troponin rise. *Int J Obstet Anesth.* 2010; 19:453-455.
117. Taylor GW, Moliterno DJ, Hillis LD. Peripartum myocardial infarction. *Am Heart J.* 1993; 126:1462-1463.
118. Togni M, Amann FW, Follath F. Spontaneous multivessel coronary artery dissection in a pregnant woman treated successfully with stent implantation. *Am J Med.* 1999; 107:407-408.
119. Trouton TG, Sidhu H, Adgey AA. Myocardial infarction in pregnancy. *Int J Cardiol.* 1988; 18:35-39.
120. Ulm MR, Obwegeser R, Ploekinger B, Nowotny C, Pidlich J, Sinzinger H. A case of myocardial infarction complicating pregnancy--a role for prostacyclin synthesis stimulating plasma factor and lipoprotein (a)? *Thromb Res.* 1996; 83:237-242.
121. van de Putte P, Martens PR. Atraumatic cardiac arrest in apparently healthy young women. *Eur J Emerg Med.* 1995; 2:179-183.
122. Varadarajan P, Isaef D, Pai RG. Prosthetic valve thrombosis presenting as an acute embolic myocardial infarction in a pregnant patient: Issues on anticoagulation regimens and thrombolytic therapy. *Echocardiography.* 2006; 23:774-779.
123. Vogiatzis I, Hadjimiltiades S, Sachpekidis V, Parcharidis G. Spontaneous coronary artery dissection and acute myocardial infarction during pregnancy. *Hellenic J Cardiol.* 2010; 51:74-80.
124. von Steinburg SP, Klein E, Langwieser N, Kastrati A, Schneider KT, Zohlhofer D. Coronary stenting after myocardial infarction during twin pregnancy--a case report. *Hypertens Pregnancy.* 2011; 30:485-489.
125. Webber MD, Halligan RE, Schumacher JA. Acute infarction, intracoronary thrombolysis, and primary PTCA in pregnancy. *Cathet Cardiovasc Diagn.* 1997; 42:38-43.

126. Wittry MD, Zimmerman TJ, Janosik DL, Williams GA. Postpartum myocardial infarction in a patient with intermittent ventricular preexcitation. *Am Heart J.* 1989; 117:191-194.
127. Yla-Outinen A, Lyrenas S, Lantz P, Langhoff-Roos J. Myocardial infarction in pregnancy. A case report and review of the literature. *Ups J Med Sci.* 1989; 94:287-290.
128. Zaidi AN, Raman SV, Cook SC. Acute myocardial infarction in early pregnancy: Definition of myocardium at risk with noncontrast T2-weighted cardiac magnetic resonance. *Am J Obstet Gynecol.* 2008; 198:e9-e12.
